# Supplementary material for: Tislelizumab vs Sorafenib as First-Line Treatment for Unresectable Hepatocellular Carcinoma: A Phase 3 Randomized Clinical Trial
Source: PubMed Central journal article supplement — JAMA Oncol. 2023 Oct 5;9(12):1651–9. doi: 10.1001/jamaoncol.2023.4003 (PMC10557031; doi:10.1001/jamaoncol.2023.4003), 2023-10-05
Supplement: jamaoncol-e234003-s001.pdf [file jamaoncol-e234003-s001.pdf]

## Supplementary Online Content

Qin S, Kudo M, Meyer T, et al. Tislelizumab vs sorafenib as first-line treatment for unresectable hepatocellular carcinoma: a phase 3 randomized clinical trial. *JAMA Oncol*. Published online October 5, 2023. doi:10.1001/jamaoncol.2023.4003

**eTable 1.** List of RATIONALE-301 Principal Investigators and Sites

**eTable 2.** Subsequent Anticancer Therapies Post Study

**eFigure 1.** Study Design

**eFigure 2.** Overall Survival by Subgroups (ITT Analysis Set)

**eFigure 3.** Duration of Response for Tislelizumab vs Sorafenib

This supplementary material has been provided by the authors to give readers additional information about their work.

**eTable 1.** List of RATIONALE-301 Principal Investigators and Sites

| <b>Principal Investigator</b>                            | <b>Site</b> | <b>Country</b> |
|----------------------------------------------------------|-------------|----------------|
| Franses, Joseph<br>Goyal, Lipika<br>Zhu, Andrew          | 1021        | United States  |
| Imagawa, David                                           | 1060        | United States  |
| Bane, Charles                                            | 1061        | United States  |
| Arora, Sukeshi                                           | 1062        | United States  |
| Costin, Dan                                              | 1074        | United States  |
| Bathini, Venu<br>Gultawatvich, Patan Switzer,<br>Bradley | 1075        | United States  |
| Rao, Subramanya                                          | 1076        | United States  |
| Kozloff, Mark                                            | 1079        | United States  |
| Park, David                                              | 1080        | United States  |
| Pyrsoopoulos, Nikolaos                                   | 1082        | United States  |
| Levy, Anna                                               | 1100        | United States  |
| Goff, Laura                                              | 1104        | United States  |
| Finn, Richard                                            | 1117        | United States  |
| Fuloria, Jyotsna                                         | 1124        | United States  |
| Satti, Suma                                              | 1125        | United States  |
| Hassanein, Tarek                                         | 1150        | United States  |
| Loaiza-Bonilla, Arturo                                   | 1152        | United States  |
| Kayali, Zeid                                             | 1176        | United States  |
| Ducreux, Michel                                          | 33004       | France         |
| Mathurin, Philippe                                       | 33006       | France         |
| Nguyen-Khac, Eric                                        | 33008       | France         |
| Heurgue Berlot, Alexandra                                | 33009       | France         |
| Archambeaud, Isabelle<br>Touchefeu, Yann                 | 33013       | France         |
| Phelip, Jean Marc                                        | 33024       | France         |
| Borg, Christophe<br>Kim, Stefano Chong-Hun               | 33025       | France         |
| Ollivier-Hourmand, Isabelle                              | 33027       | France         |
| Assenat, Eric                                            | 33028       | France         |
| Frin, Anne-Claire                                        | 33034       | France         |
| Tougeron, David                                          | 33036       | France         |
| Bouattour, Mohamed                                       | 33064       | France         |
| Decaens, Thomas                                          | 33066       | France         |
| Rosmorduc, Olivier                                       | 33072       | France         |
| Campos Marionna, Calvo                                   | 34007       | Spain          |
| Cubillo Gracian, Antonio                                 | 34021       | Spain          |
| Diaz Beveridge, Roberto                                  | 34032       | Spain          |

| <b>Principal Investigator</b>                            | <b>Site</b> | <b>Country</b> |
|----------------------------------------------------------|-------------|----------------|
| Macarulla, Teresa                                        | 34034       | Spain          |
| Piscaglia, Fabio                                         | 39008       | Italy          |
| Pedrazzoli, Paolo                                        | 39013       | Italy          |
| Giuseppe, Aprile                                         | 39014       | Italy          |
| Villa, Erica                                             | 39015       | Italy          |
| Passalacqua, Rodolfo<br>Tomasello, Gianluca              | 39016       | Italy          |
| Giannelli, Gianluigi                                     | 39017       | Italy          |
| Giovanis, Petros<br>Pastorelli, Davide                   | 39027       | Italy          |
| Di Maio, Massimo                                         | 39048       | Italy          |
| Soto Parra, Hector Jose                                  | 39051       | Italy          |
| Cognetti, Francesco                                      | 39052       | Italy          |
| Leo, Silvana                                             | 39053       | Italy          |
| Porta, Camillo                                           | 39062       | Italy          |
| Hubner, Richard                                          | 44012       | United Kingdom |
| Meyer, Timothy                                           | 44024       | United Kingdom |
| Panjak, Punia                                            | 44030       | United Kingdom |
| Ross, Paul                                               | 44039       | United Kingdom |
| Bar-Letkiewicz, Ilona                                    | 48019       | Poland         |
| Zaucha, Renata                                           | 48020       | Poland         |
| Wyrwicz, Lucjan                                          | 48023       | Poland         |
| Simon, Krzysztof                                         | 48024       | Poland         |
| Ettrich, Thomas                                          | 49006       | Germany        |
| Thorsten, Gotze                                          | 49007       | Germany        |
| Waldschmidt, Dirk-Thomas                                 | 49008       | Germany        |
| Christoph, Daniel<br>Pluntke, Stefan                     | 49009       | Germany        |
| Vogel, Arndt                                             | 49010       | Germany        |
| Wege, Henning                                            | 49011       | Germany        |
| Gonzalez-Carmona, Maria                                  | 49013       | Germany        |
| Muller, Tobias                                           | 49014       | Germany        |
| Berg, Thomas                                             | 49016       | Germany        |
| Verena, Keitel                                           | 49049       | Germany        |
| Satoh, Taroh                                             | 81001       | Japan          |
| Kondo, Yuji                                              | 81002       | Japan          |
| Wada, Yoshiyuki                                          | 81005       | Japan          |
| Sasaki, Yutaka<br>Tanaka, Motohiko<br>Tateyama, Masakuni | 81006       | Japan          |
| Ohkawa, Kazuyoshi                                        | 81007       | Japan          |
| Kudo, Masatoshi                                          | 81008       | Japan          |
| Isomoto, Hajime                                          | 81010       | Japan          |

| <b>Principal Investigator</b>            | <b>Site</b> | <b>Country</b> |
|------------------------------------------|-------------|----------------|
| Mita, Eiji                               | 81011       | Japan          |
| Hagihara, Atsushi                        | 81012       | Japan          |
| Hiraoka, Atsushi                         | 81013       | Japan          |
| Numata, Kazushi                          | 81014       | Japan          |
| Morimoto, Manabu                         | 81016       | Japan          |
| Kojima, Yasushi                          | 81018       | Japan          |
| Ogawa, Koji                              | 81019       | Japan          |
| Nakata, Rto<br>Yoshida, Hideo            | 81020       | Japan          |
| Itoh, Yoshito                            | 81021       | Japan          |
| Aoki, Masaru<br>Yamashita, Tatsuya       | 81024       | Japan          |
| Toyoda, Hidenori                         | 81025       | Japan          |
| Kioka, Kiyohide                          | 81027       | Japan          |
| Kawabe, Naoto                            | 81028       | Japan          |
| Kuroda, Hidekatsu Takayama,<br>Tadatoshi | 81040       | Japan          |
| Kato, Naoya                              | 81041       | Japan          |
| Kitano, Masayuki                         | 81042       | Japan          |
| Abiru, Seigo                             | 81043       | Japan          |
| Kuroda, Hidekatsu Takikawa,<br>Yasuhiro  | 81046       | Japan          |
| Hatano, Etsuro                           | 81047       | Japan          |
| Xing, Baocai                             | 86001       | China          |
| Lin, Xiaoyan                             | 86004       | China          |
| Chen, Xiaoming                           | 86005       | China          |
| Wang, Jufeng                             | 86006       | China          |
| Guo, Yabing                              | 86008       | China          |
| Zhao, Haitao                             | 86009       | China          |
| Fang, Weijia                             | 86014       | China          |
| Zhu, Xiaoli                              | 86015       | China          |
| Bai, Yuxian                              | 86022       | China          |
| Liu, Xiufeng                             | 86025       | China          |
| Li, Wei                                  | 86026       | China          |
| Ying, Jieer                              | 86027       | China          |
| Gu, Kangsheng                            | 86028       | China          |
| Pan, Yueyin                              | 86029       | China          |
| Wang, Zishu                              | 86030       | China          |
| Chen, Zhendong                           | 86031       | China          |
| Ren, Zhenggang                           | 86032       | China          |
| Meng, Zhiqiang                           | 86033       | China          |
| Zhou, Fuxiang                            | 86035       | China          |
| Lin, Hailan                              | 86036       | China          |

| <b>Principal Investigator</b> | <b>Site</b> | <b>Country</b> |
|-------------------------------|-------------|----------------|
| Wu, Jianbing                  | 86037       | China          |
| Pan, Hongming                 | 86038       | China          |
| Li, EnXiao                    | 86039       | China          |
| Zhang, Tao                    | 86040       | China          |
| Lu, Yinying                   | 86041       | China          |
| Dai, Guanghai                 | 86042       | China          |
| Cheng, Ying                   | 86043       | China          |
| Zhou, Aiping                  | 86044       | China          |
| Yu, Guohua                    | 86045       | China          |
| Zhang, Tao                    | 86046       | China          |
| Qiu, Wensheng                 | 86047       | China          |
| Song, Tianqiang               | 86048       | China          |
| Hu, Sheng                     | 86055       | China          |
| Yang, Jianyong                | 86056       | China          |
| Feng, Jifeng                  | 86096       | China          |
| Chen, Yajin                   | 86099       | China          |
| Xu, Bin                       | 86145       | China          |
| Melichar, Bohuslav            | 420004      | Czech Republic |
| Kral, Zdenek                  | 420009      | Czech Republic |
| Prausova, Jana                | 420010      | Czech Republic |
| Chen, Shinn-Cherng            | 886001      | Taiwan         |
| Kuo, Hsing-Tao                | 886009      | Taiwan         |
| Lee, Teng-Yu                  | 886011      | Taiwan         |
| Chang, Ting-Tsung             | 886042      | Taiwan         |
| Wang, Jing-Houng              | 886044      | Taiwan         |
| Chao, Yee                     | 886045      | Taiwan         |
| Hou, Ming-Mo                  | 886046      | Taiwan         |
| Ho, Ching-Liang               | 886047      | Taiwan         |
| Jeng, Long-Bin                | 886048      | Taiwan         |

**eTable 2.** Subsequent Anticancer Therapies Post Study

| n (%) <sup>a</sup>                               | Tislelizumab (n = 342) | Sorafenib (n = 332) |
|--------------------------------------------------|------------------------|---------------------|
| Any subsequent anti-cancer treatment             | 207 (60.5)             | 222 (66.9)          |
| Procedure, radiotherapy, embolization or surgery | 82 (24.0)              | 78 (23.5)           |
| Systemic therapy                                 | 185 (54.1)             | 199 (59.9)          |
| TKI <sup>b</sup>                                 | 175 (51.2)             | 137 (41.3)          |
| Sorafenib                                        | 104 (30.4)             | 15 (4.5)            |
| Lenvatinib                                       | 73 (21.3)              | 66 (19.9)           |
| Regorafenib                                      | 25 (7.3)               | 48 (14.5)           |
| Cabozantinib                                     | 15 (4.4)               | 22 (6.6)            |
| Apatinib                                         | 12 (3.5)               | 12 (3.6)            |
| Rivoceranib                                      | 7 (2.0)                | 7 (2.1)             |
| Catequentinib                                    | 3 (0.9)                | 4 (1.2)             |
| Immunotherapy <sup>b</sup>                       | 33 (9.6)               | 87 (26.2)           |
| Atezolizumab                                     | 11 (3.2)               | 17 (5.1)            |
| Sintilimab                                       | 9 (2.6)                | 8 (2.4)             |
| Camrelizumab                                     | 6 (1.8)                | 10 (3.0)            |
| Pembrolizumab                                    | 6 (1.8)                | 11 (3.3)            |
| Toripalimab                                      | 3 (0.9)                | 6 (1.8)             |
| Nivolumab                                        | 2 (0.6)                | 11 (3.3)            |
| Monoclonal antibodies                            | 2 (0.6)                | 20 (6.0)            |
| Anti-angiogenesis (non-TKI) <sup>b</sup>         | 18 (5.3)               | 19 (5.7)            |
| Bevacizumab                                      | 13 (3.8)               | 16 (4.8)            |
| Ramucirumab                                      | 5 (1.5)                | 6 (1.8)             |
| Chemotherapy <sup>b</sup>                        | 12 (3.5)               | 15 (4.5)            |
| Investigational agent <sup>b</sup>               | 3 (0.9)                | 27 (8.1)            |
| Other <sup>c</sup>                               | 3 (0.9)                | 27 (8.1)            |

Abbreviations: TKI, tyrosine kinase inhibitor.

<sup>a</sup>Subsequent anticancer therapies received by ≥1% of patients in either treatment arm are reported. <sup>b</sup>Received as systemic therapy. <sup>c</sup>Other<sup>c</sup> included antineoplastic agents, mtl cebpa, onatasertib, avdoralimab, bay 1895344, capmatinib, lenalidomide, pomalidomide, and *Streptococcus pyogenes*.

**eFigure 1. Study Design**

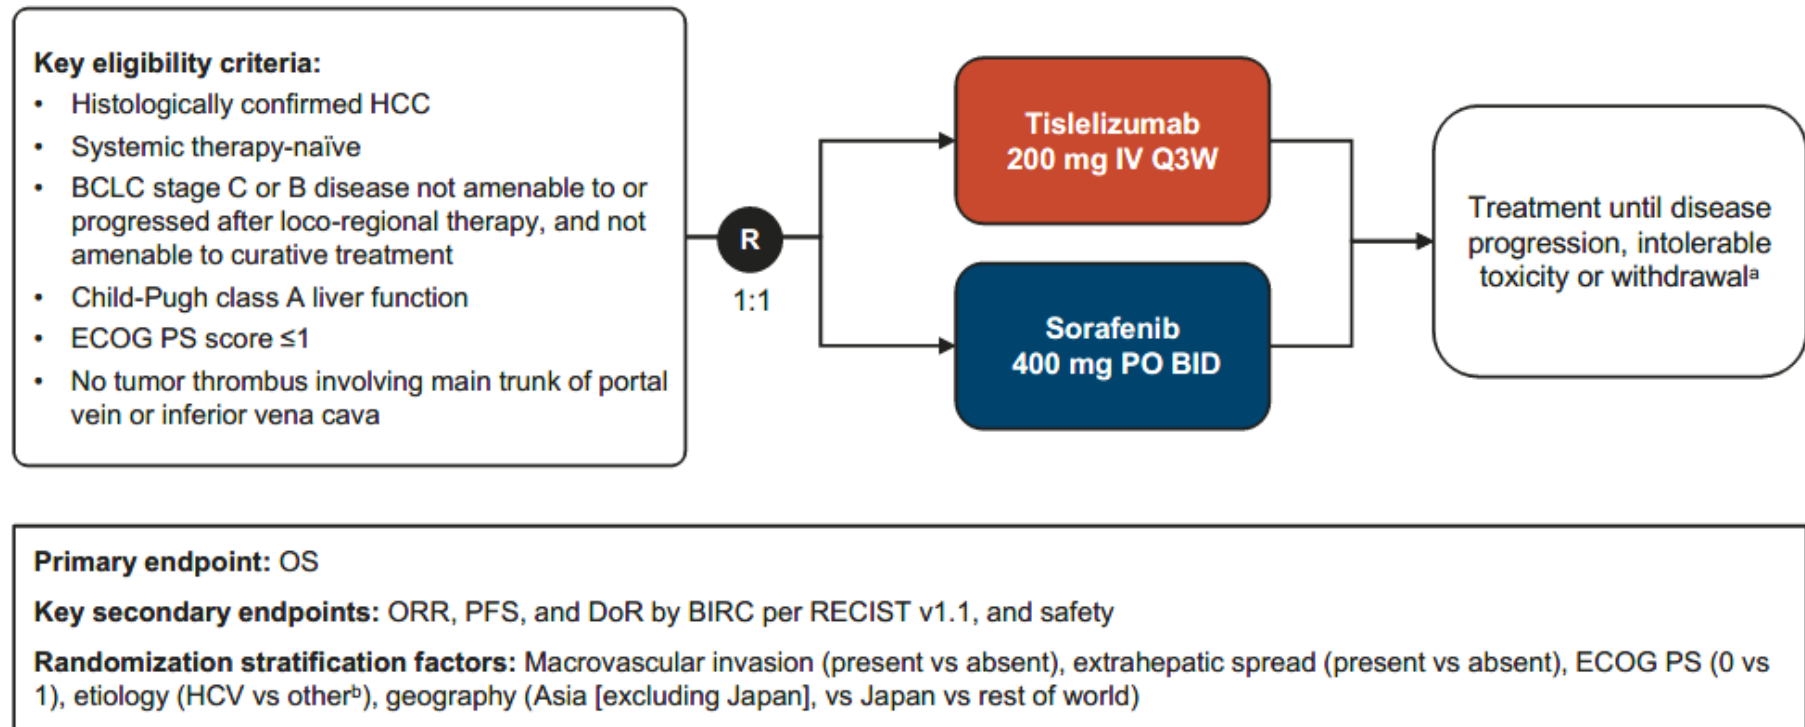

Abbreviations: BCLC, Barcelona Clinic Liver Cancer; BID, twice daily; BIRC, blinded independent review committee; DoR, duration of response; ECOG PS, Eastern Cooperative Oncology Group performance status; HBV, hepatitis B virus; HCC, hepatocellular carcinoma; HCV, hepatitis C virus; IV, intravenous; ORR, objective response rate; OS, overall survival; PFS, progression-free survival; PO, oral; Q3W, once every 3 weeks; RECIST, Response Evaluation Criteria in Solid Tumors.

<sup>a</sup>Patients in both arms could continue treatment after disease progression providing there was no symptomatic deterioration, ECOG PS remained ≤1, and there was no rapid progression of disease or progression at a critical anatomical site. <sup>b</sup>Includes HBV.

## eFigure 2. Overall Survival by Subgroups (ITT Analysis Set)

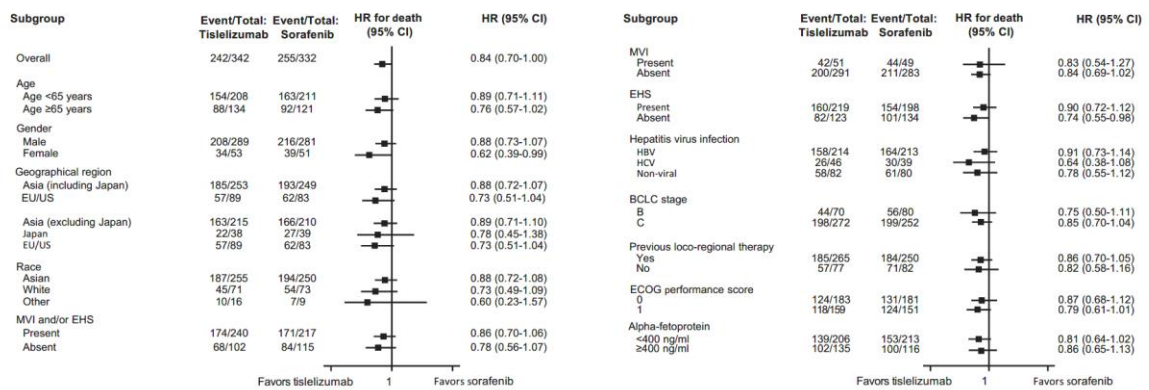

Abbreviations: BCLC, Barcelona Clinic Liver Cancer; CI, confidence interval; ECOG, Eastern Cooperative Oncology Group; EHS, extrahepatic spread; EU, Europe; HBV, hepatitis B virus; HCV, hepatitis C virus; HR, hazard ratio; ITT, intent-to-treat; MVI, macrovascular invasion; US, United States.

Data cutoff: July 11, 2022.

All subgroups were predefined.



**eFigure 3.** Duration of Response for Tislelizumab vs Sorafenib

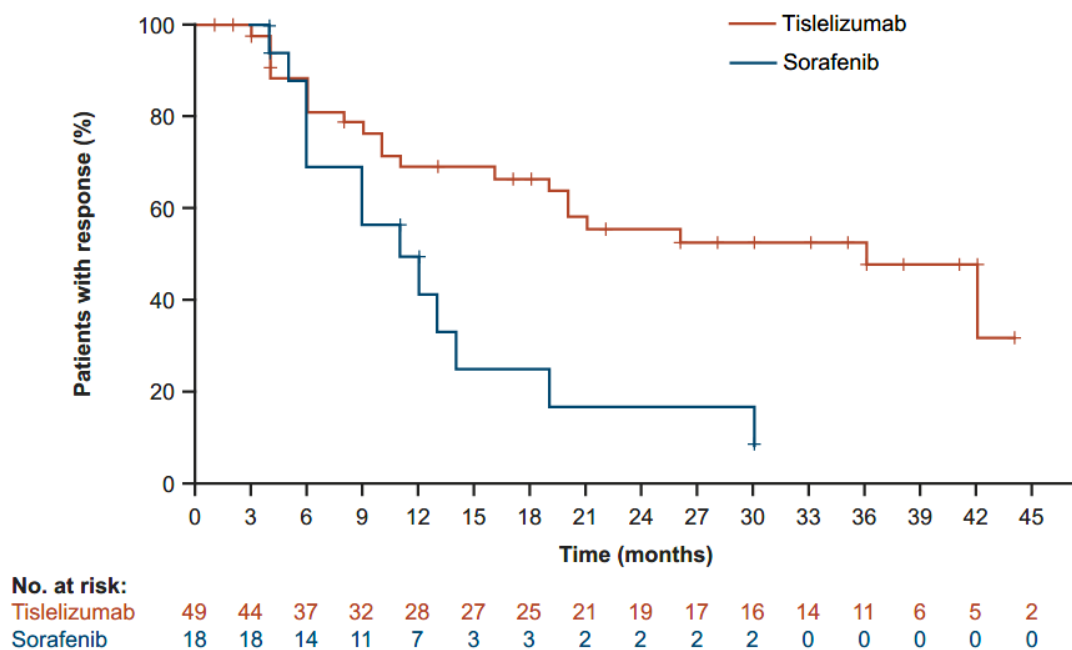

Data cutoff: July 11, 2022. Data for patients who started to receive new anticancer therapy or were lost to follow-up were censored at the last valid tumor assessment date.
